# Supplementary material
Source: PubMed Central journal article supplement (PMC3191310)

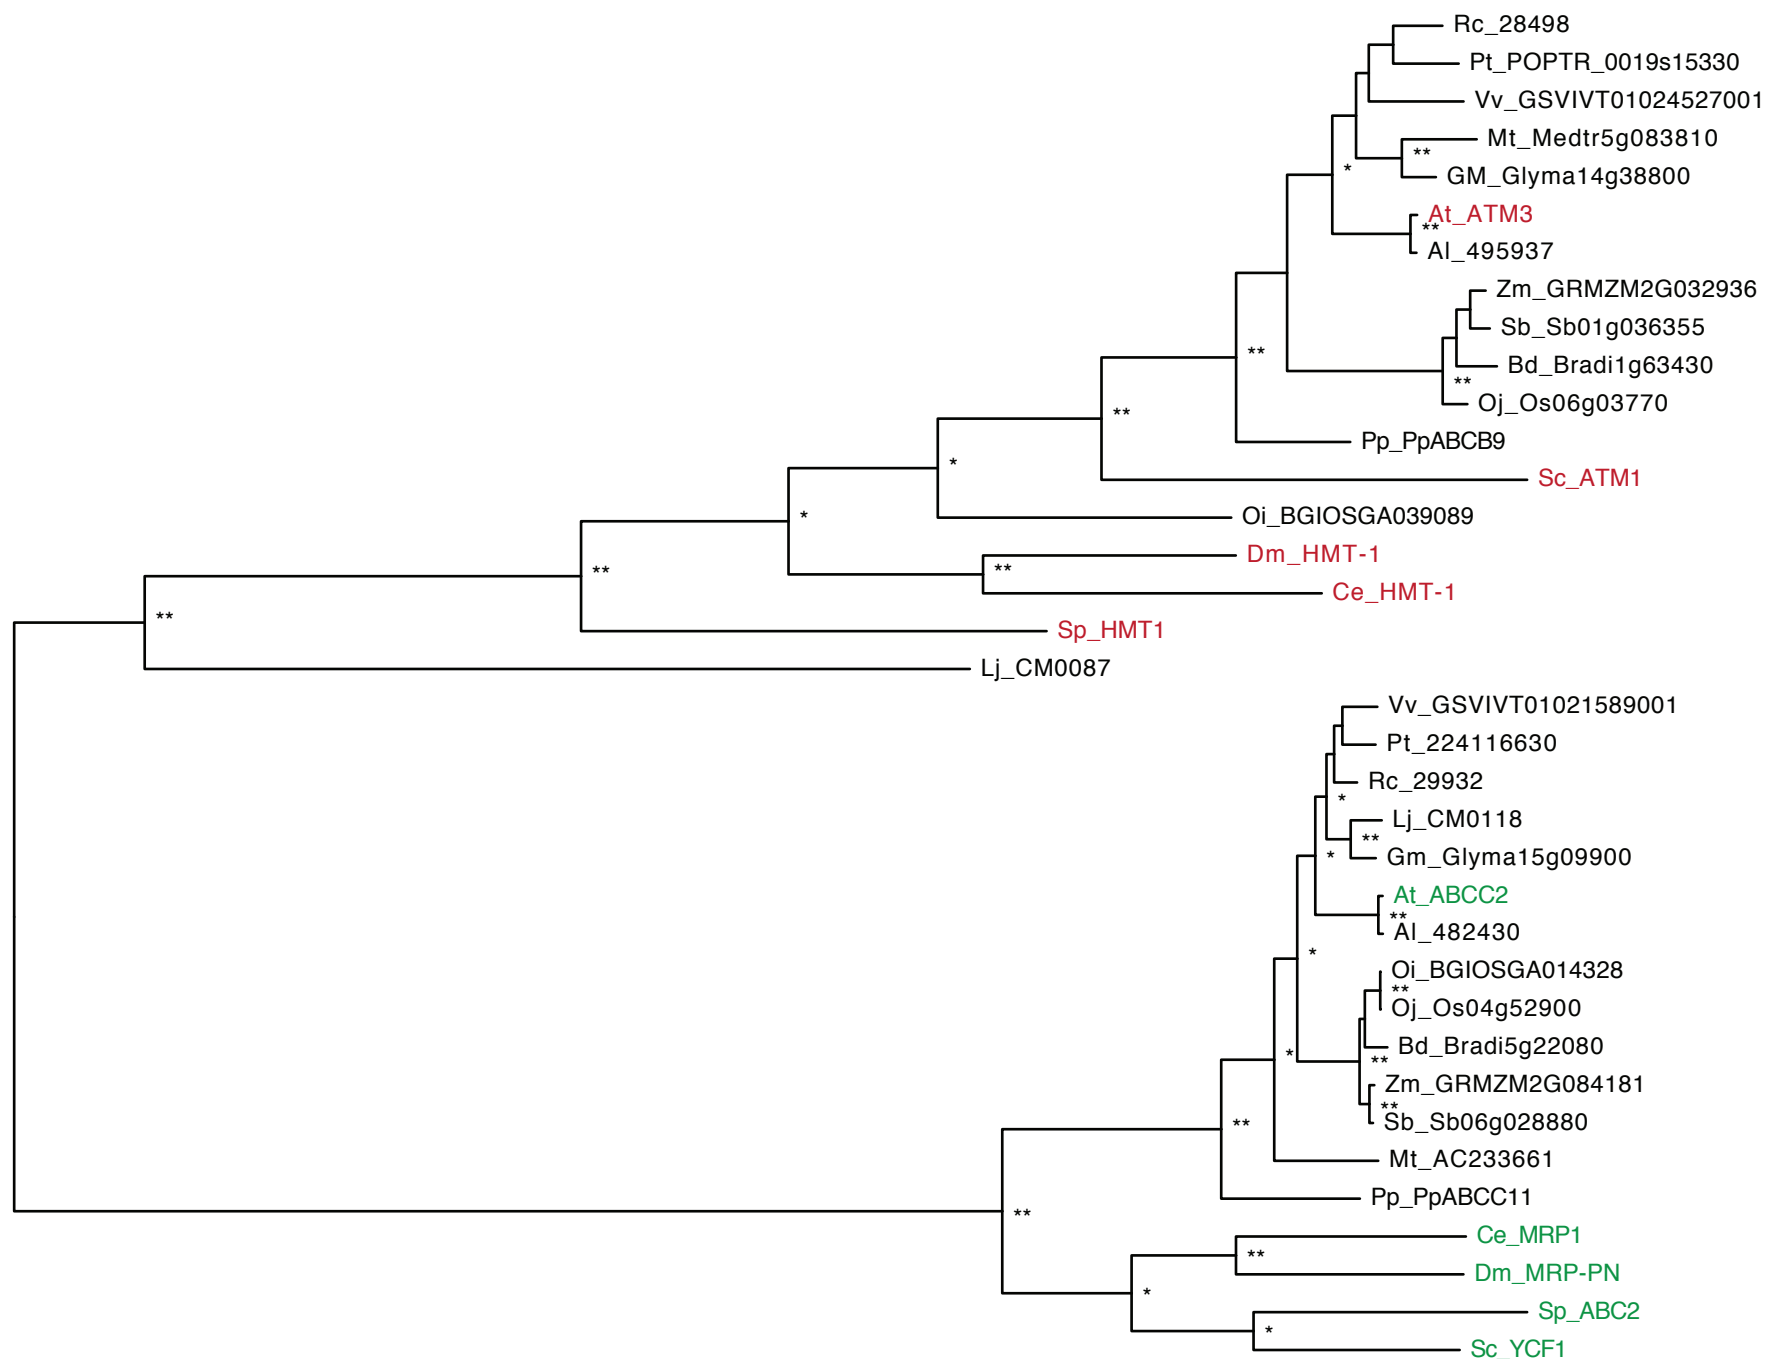

similar to Sp HMT-1

similar to At ABCC2

Supp Figure 1

Supplement: NIHMS318157-supplement-02.pdf [file NIHMS318157-supplement-02.pdf]

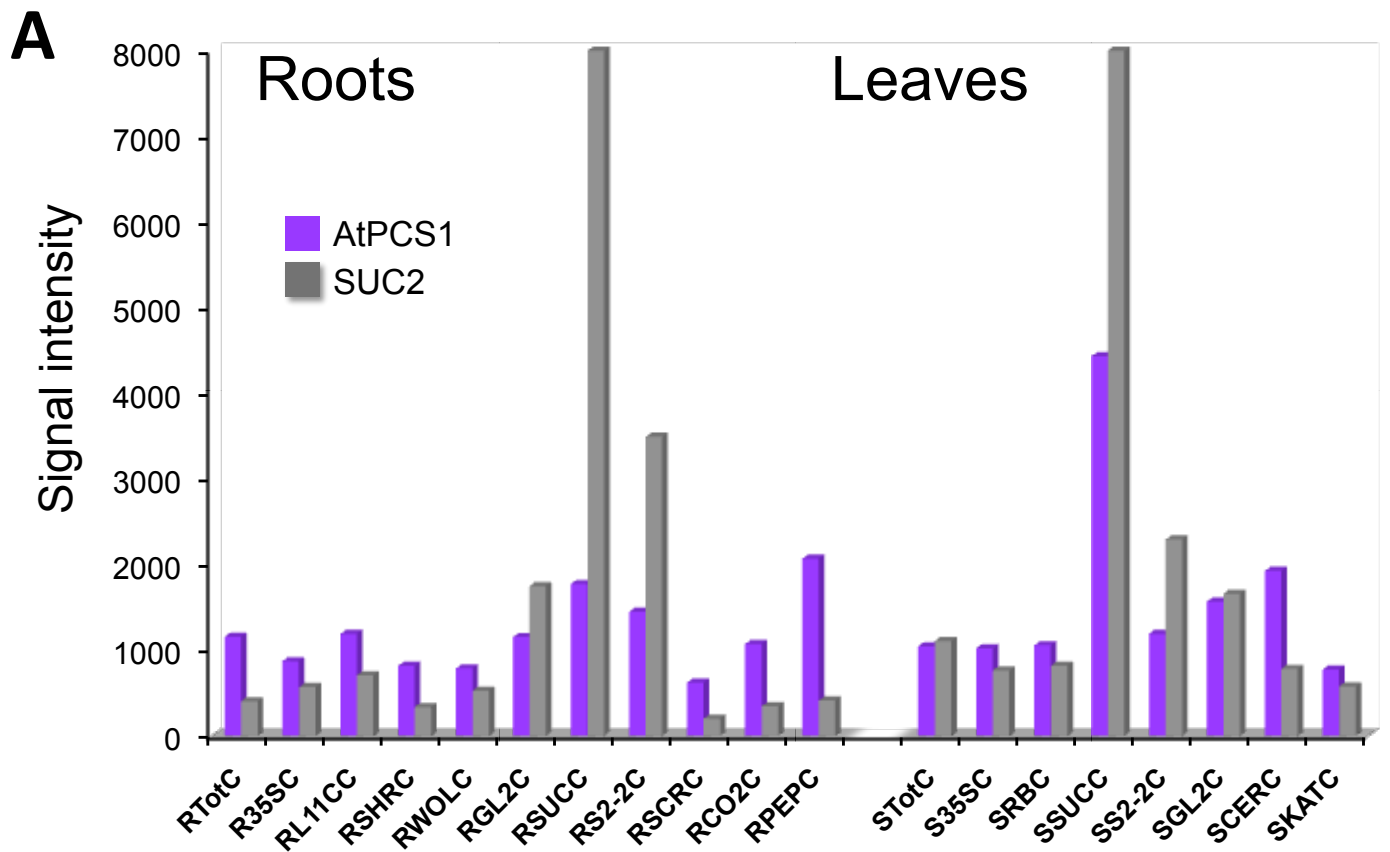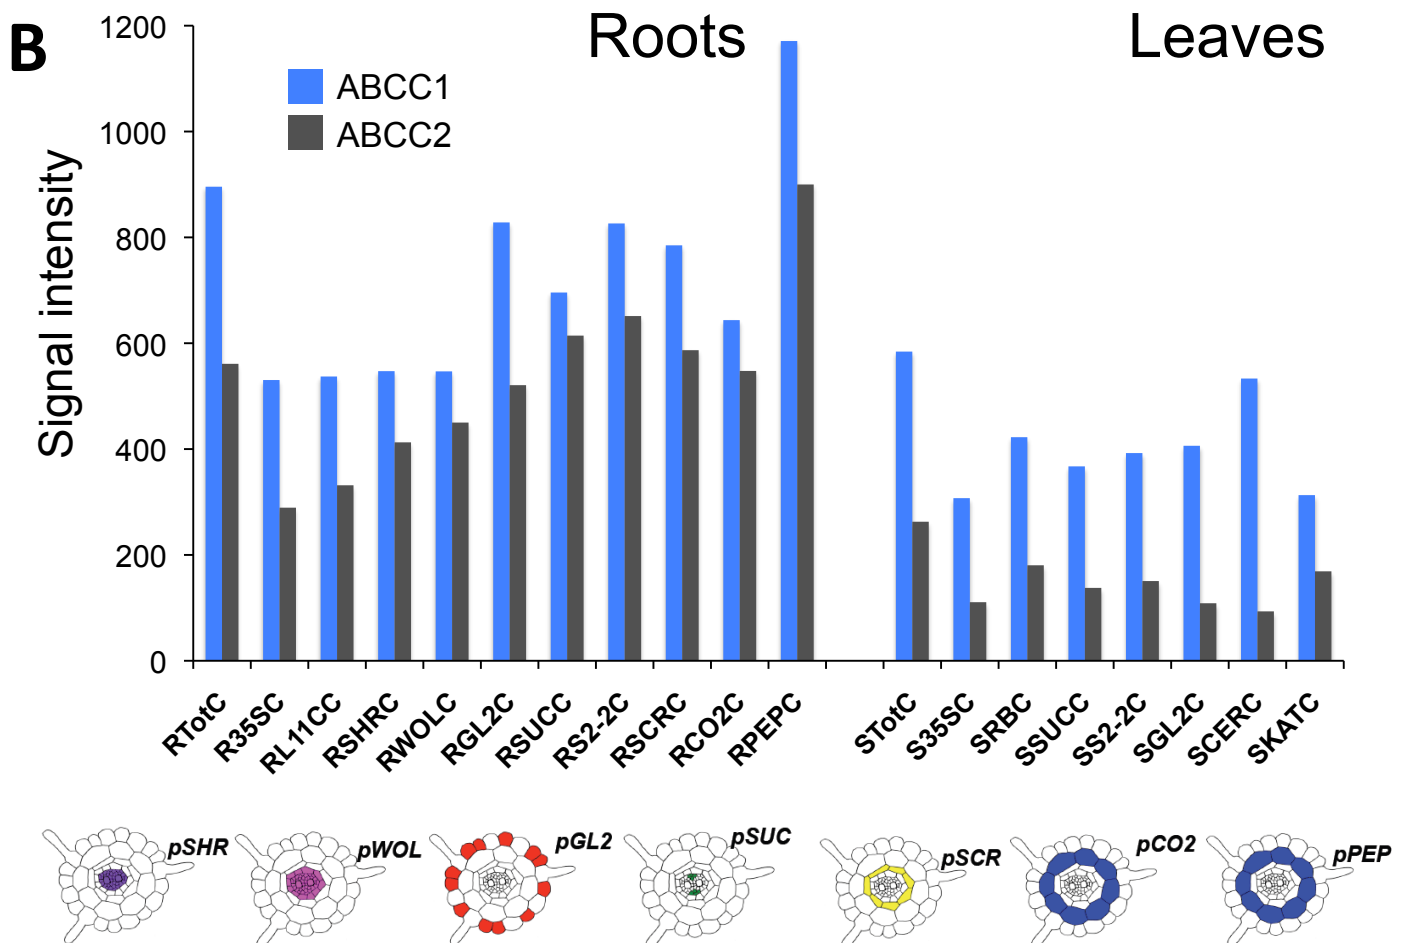

Supp Figure 2

Supplement: NIHMS318157-supplement-03.pdf [file NIHMS318157-supplement-03.pdf]
